# Supplementary material
Source: PubMed Central journal article supplement (PMC5115504)
Supplement: ADVS-3-0a-s001.pdf [file ADVS-3-0a-s001.pdf]

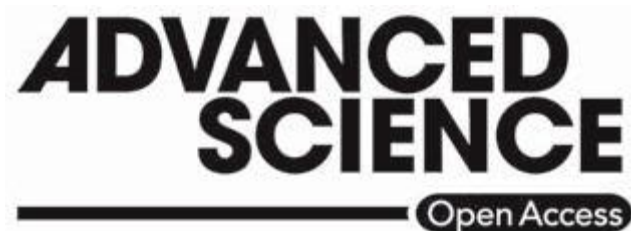

## Supporting Information

for *Adv. Sci.*, DOI: 10.1002/advs. 201500255

Efficient Charging of Li-Ion Batteries with Pulsed Output Current of Triboelectric Nanogenerators

*Xiong Pu , Mengmeng Liu , Linxuan Li , Chi Zhang , Yaokun Pang , Chunyan Jiang , Lihua Shao , Weiguo Hu , \* and Zhong Lin Wang \**

Copyright WILEY-VCH Verlag GmbH & Co. KGaA, 69469 Weinheim, Germany, 2013.

## Supporting Information

### **Efficient Charging of Li-ion Batteries with Pulsed Output Current of Triboelectric Nanogenerators**

*Xiong Pu, Mengmeng Liu, Linxuan Li, Chi Zhang, Yaokun Pang, Chunyan Jiang, Lihua Shao,  
Weiguo Hu,\* Zhong Lin Wang\**

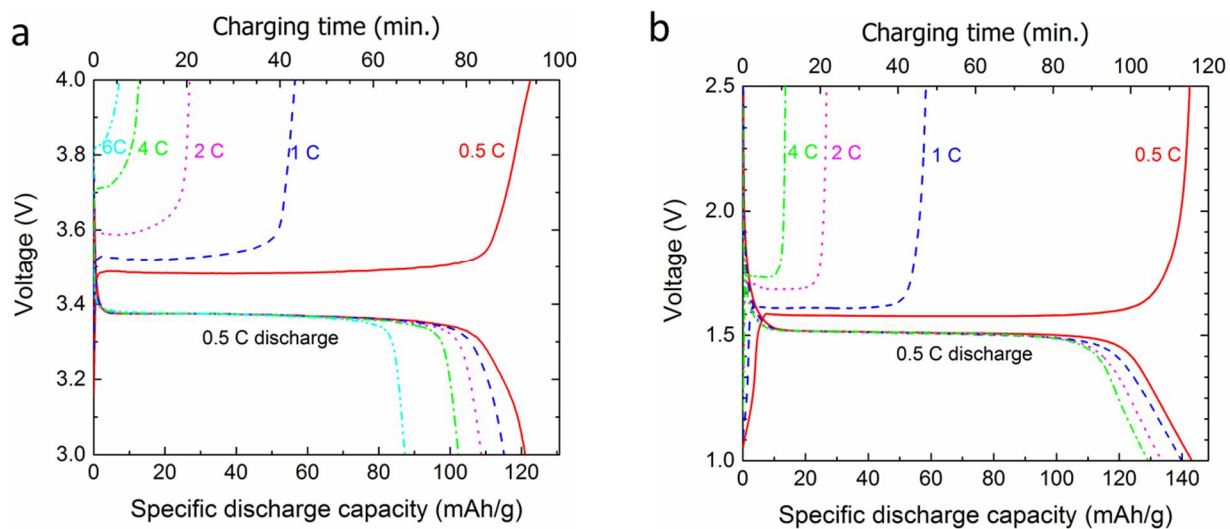

**Figure S1.** Voltage profiles of  $\text{LiFePO}_4$  (a) and  $\text{Li}_4\text{Ti}_5\text{O}_{12}$  (b) half cells charged at different C rates and discharged at 0.5 C rate.

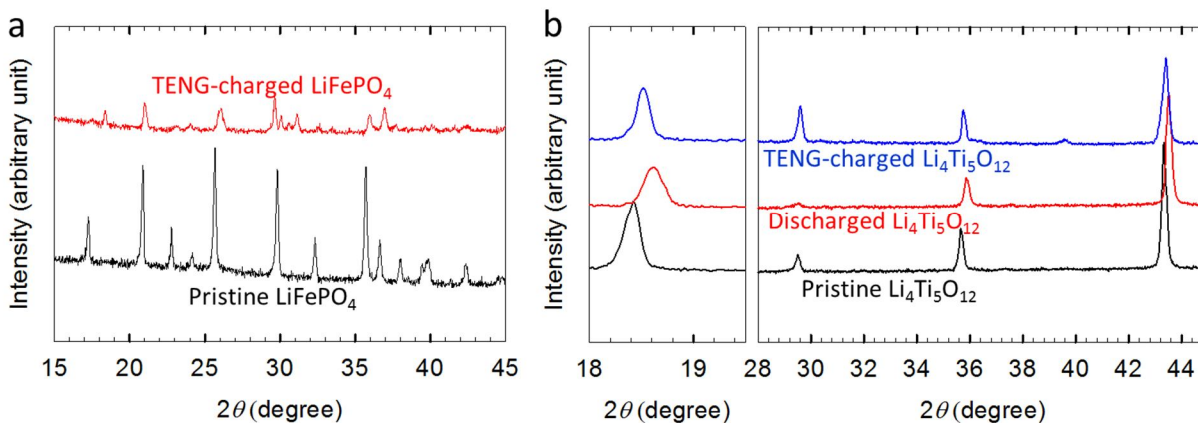

**Figure S2.** X-ray diffraction patterns of  $\text{LiFePO}_4$  (a) and  $\text{Li}_4\text{Ti}_5\text{O}_{12}$  (b) before and after the charge by TENG.

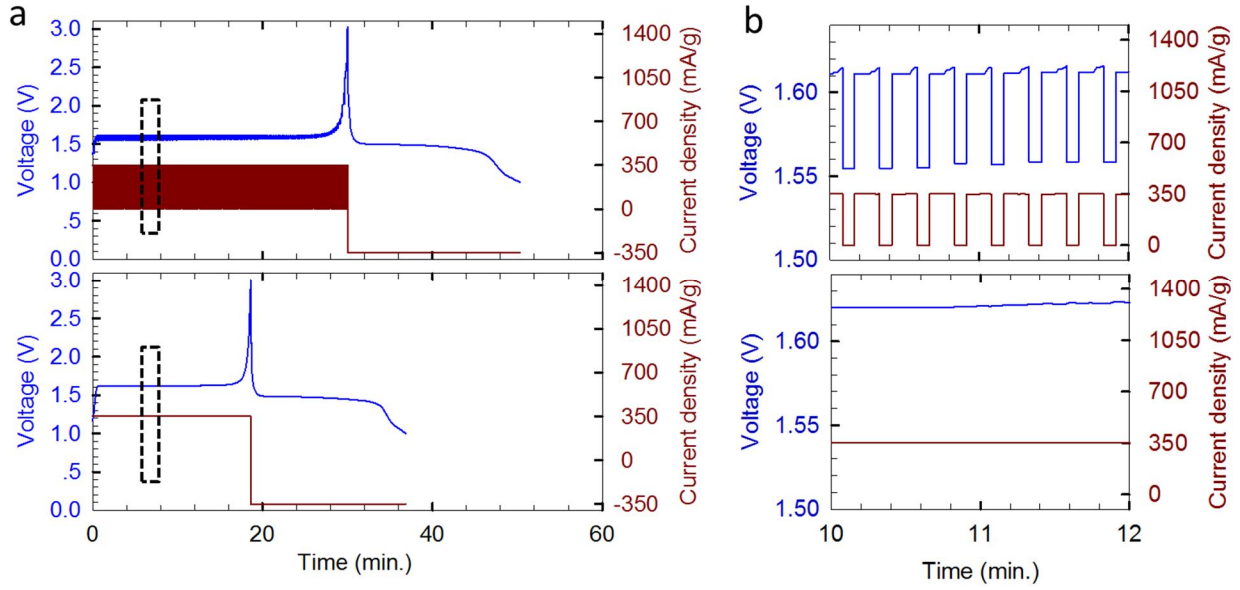

**Figure S3.** Voltage profiles of  $\text{Li}_4\text{Ti}_5\text{O}_{12}$  half cell charged by pulsed current (the upper plot) and constant current (the bottom plot) at 350 mA/g. (b) is the enlarged view of the rectangular area in (a).

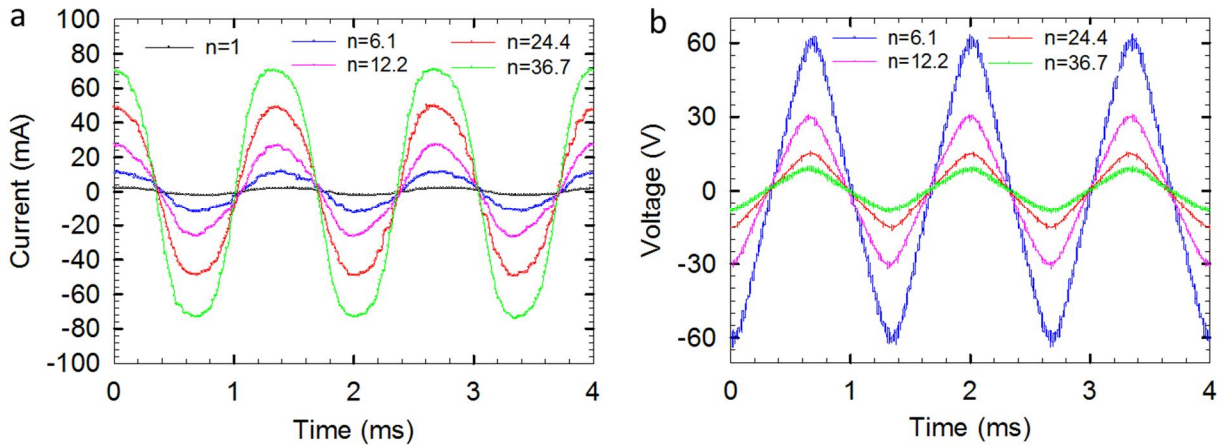

**Figure S4.** Short-circuit current (a) and open-circuit voltage (b) of the TENG at 250 rpm with different transformer coil ratio  $n$ .

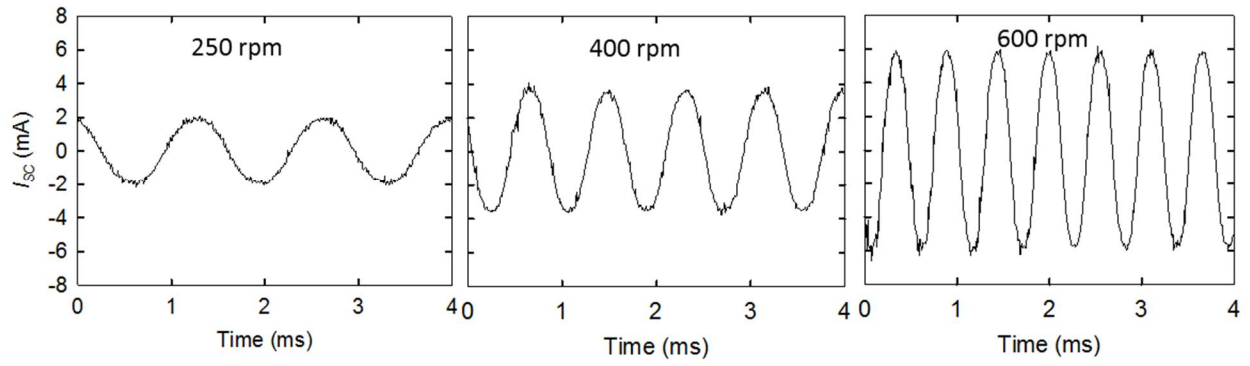

**Figure S5.** Short-circuit current of the TENG at different rotation speed without transforming, i.e 250 rpm, 400 rpm, 600 rpm.

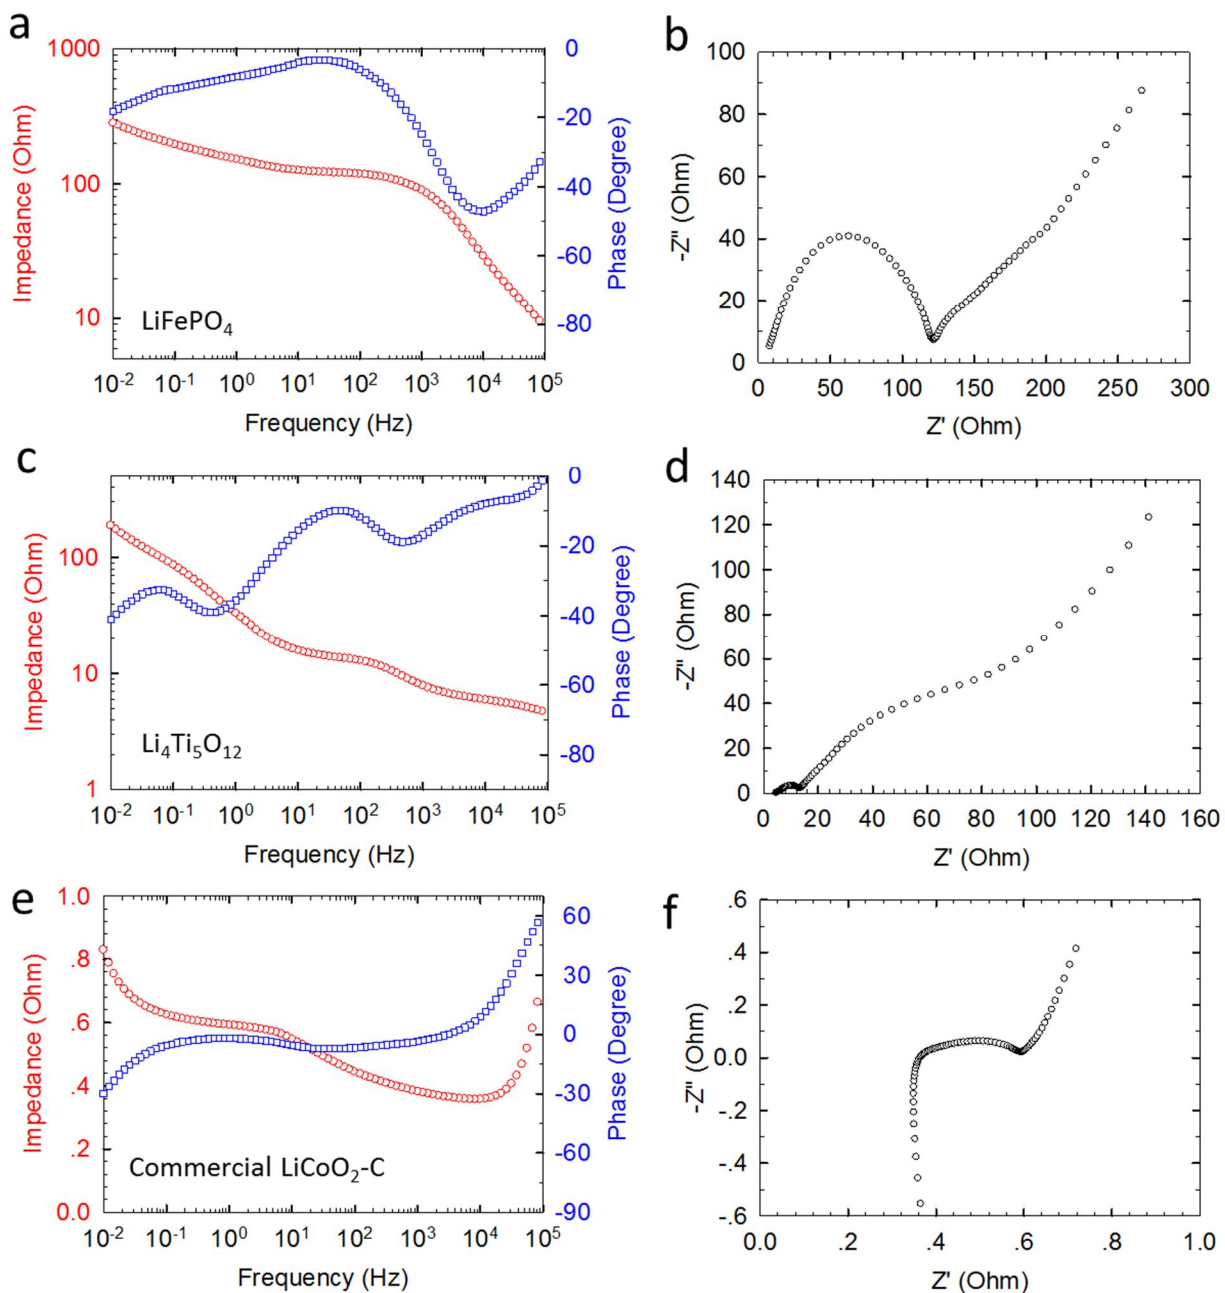

**Figure S6.** Bode plot (a, c and e) and Nyquist plot (b, d and f) of the impedances of  $\text{LiFePO}_4$  (a and b) half cell,  $\text{Li}_4\text{Ti}_5\text{O}_{12}$  (c and d) half cell, and a commercial  $\text{LiCoO}_2\text{-C}$  full cell ( $\sim 200$  mAh) at discharged state.
